# Supplementary material
Source: publisher figshare collection journal article supplement (https://acs.figshare.com/ndownloader/files/4041067)
Supplement: Supplementary file 1 [file 4041067]

## Supporting Information

# Reversible Assembly and Disassembly of Amphiphilic Assemblies by Electropolymerized Polyaniline Films: Effects Rendered by Varying the Electropolymerization Potential

*Kingshuk Dutta\* and Patit P. Kundu\**

Advanced Polymer Laboratory, Department of Polymer Science and Technology, University of  
Calcutta, 92, A.P.C. Road, Kolkata – 700 009, India.

## FIGURES

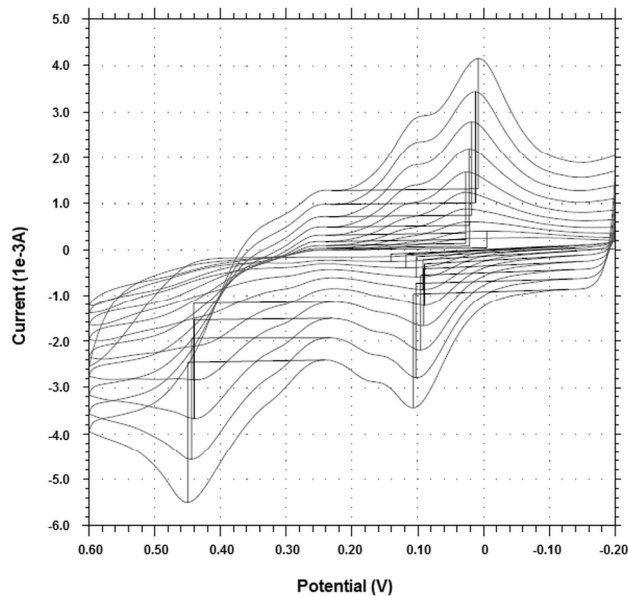

**Figure S1.** Cyclic voltammetry plot for the OxPAni film electropolymerized at +0.6 V.

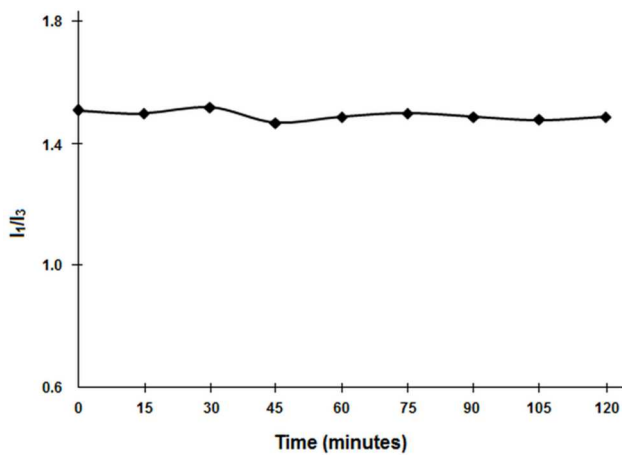

**Figure S2.** Plot representing the interaction of pyrene with OxPAni film prepared at +0.6 V (in absence of amphiphile). The unchanged  $I_1/I_3$  value indicates that within the time period of the disassembly phenomenon, there was no interaction between pyrene and the polymer film.
